# Supplementary material for: Two Homologues of the Global Regulator Csr/Rsm Redundantly Control Phaseolotoxin Biosynthesis and Virulence in the Plant Pathogen Pseudomonas amygdali pv. phaseolicola 1448A
Source: PubMed Central journal article supplement (PMC7600136; doi:10.3390/microorganisms8101536), 2020-10-06
Supplement: microorganisms-08-01536-s001.pdf [file microorganisms-08-01536-s001.pdf]

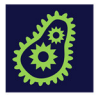

Article

# Two Homologues of the Global Regulator Csr/Rsm Redundantly Control Phaseolotoxin Biosynthesis and Virulence in the Plant Pathogen *Pseudomonas amygdali* pv. *phaseolicola* 1448A

Diana Ramírez-Zapata <sup>1</sup>, Cayo Ramos <sup>2,3</sup>, Selene Aguilera <sup>4</sup>, Leire Bardaji <sup>1</sup>, Marta Martínez-Gil <sup>2,3</sup> and Jesús Murillo <sup>2,\*</sup>

<sup>1</sup> Institute for Multidisciplinary Research in Applied Biology, Universidad Pública de Navarra, 31192 Mutilva Baja, Spain; diana.ramirez@unavarra.es (D.R.-Z); leire.bardaji.goikoetxea@gmail.com (L.B.); jesus.murillo@unavarra.es (J.M.; ORCID 0000-0001-6585-2421)

<sup>2</sup> Área de Genética, Facultad de Ciencias, Universidad de Málaga, Campus Teatinos s/n, E-29010 Málaga, Spain; crr@uma.es (C.R.; ORCID 0000-0002-2362-5041); martamgv@uma.es (M.M.-G.)

<sup>3</sup> Área de Genética, Instituto de Hortofruticultura Subtropical y Mediterránea «La Mayora», Consejo Superior de Investigaciones Científicas (IHSM-UMA-CSIC), E-29010 Málaga, Spain

<sup>4</sup> Departamento de Química y Bioquímica, Instituto Tecnológico de Tepic, Colonia Lagos del Country, CP 63175 Tepic, Nayarit, México; seleagui@gmail.com

\* Correspondence: jesus.murillo@unavarra.es; Tel.: +34-948168007

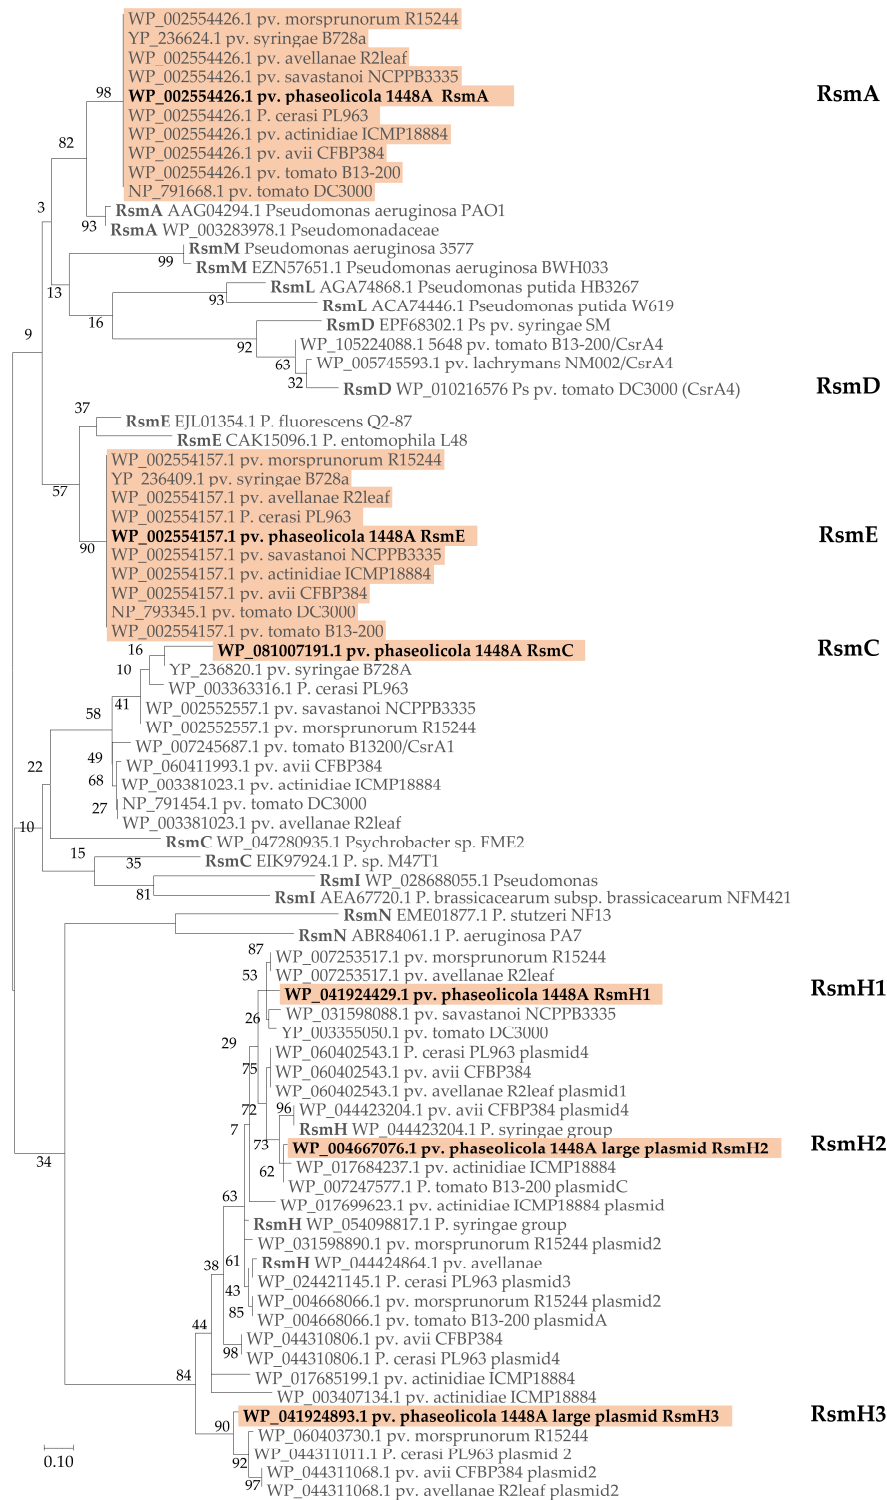

**Figure S1.** Phylogeny of Rsm proteins from selected strains of *Pseudomonas syringae sensu lato* and assignment to subfamilies. The Rsm proteins present in each genome were identified by Blastp comparison using as query the Rsm proteins from Pph 1448A and RsmD from *P.s.* pv. tomato DC3000; all the identified proteins were included to construct the tree plus two or three representative proteins from each of the 9 Rsm subfamilies [1]. For simplicity, strains previously classified as *P. syringae* are indicated only by their pathovar and strain assignation. Protein alignment with Muscle, identification of the best model and construction of the maximum likelihood tree, using the JTT model with a discrete Gamma distribution with five categories and using all sites, were done with MEGA7 [2]. Orange highlighting, proteins from strain Pph 1448A or identical to them in each clade. The tree is drawn to scale, with branch lengths measured in the number of substitutions per site. Numbers in branches indicate per cent bootstrap values with 200 replicates. To the right, name of the previously defined phylogenetic Rsm subfamilies [1].

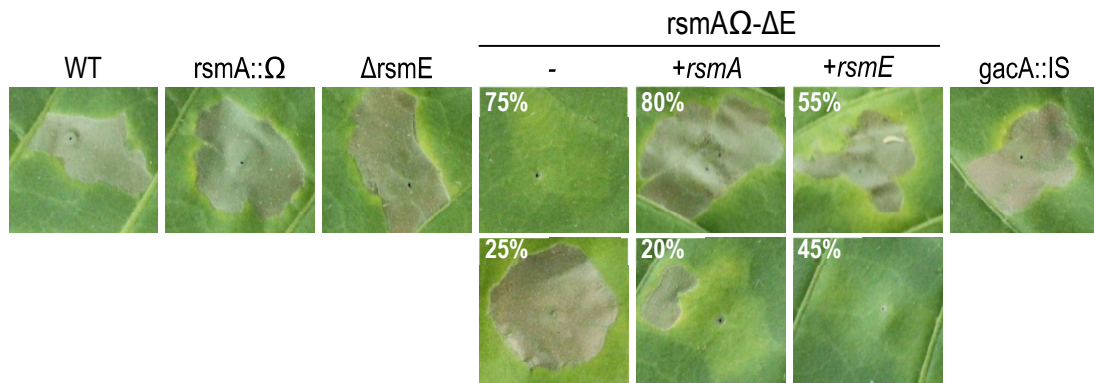

**Figure S2.** Effect of different *rsm* homologues from *P. amygdali* pv. phaseolicola 1448A on the elicitation of the hypersensitive response on tobacco leaves. Results are representative from at least 25 inoculations on at least four different plants. For mutants inducing different types of reaction, it is shown the percentage of each type.

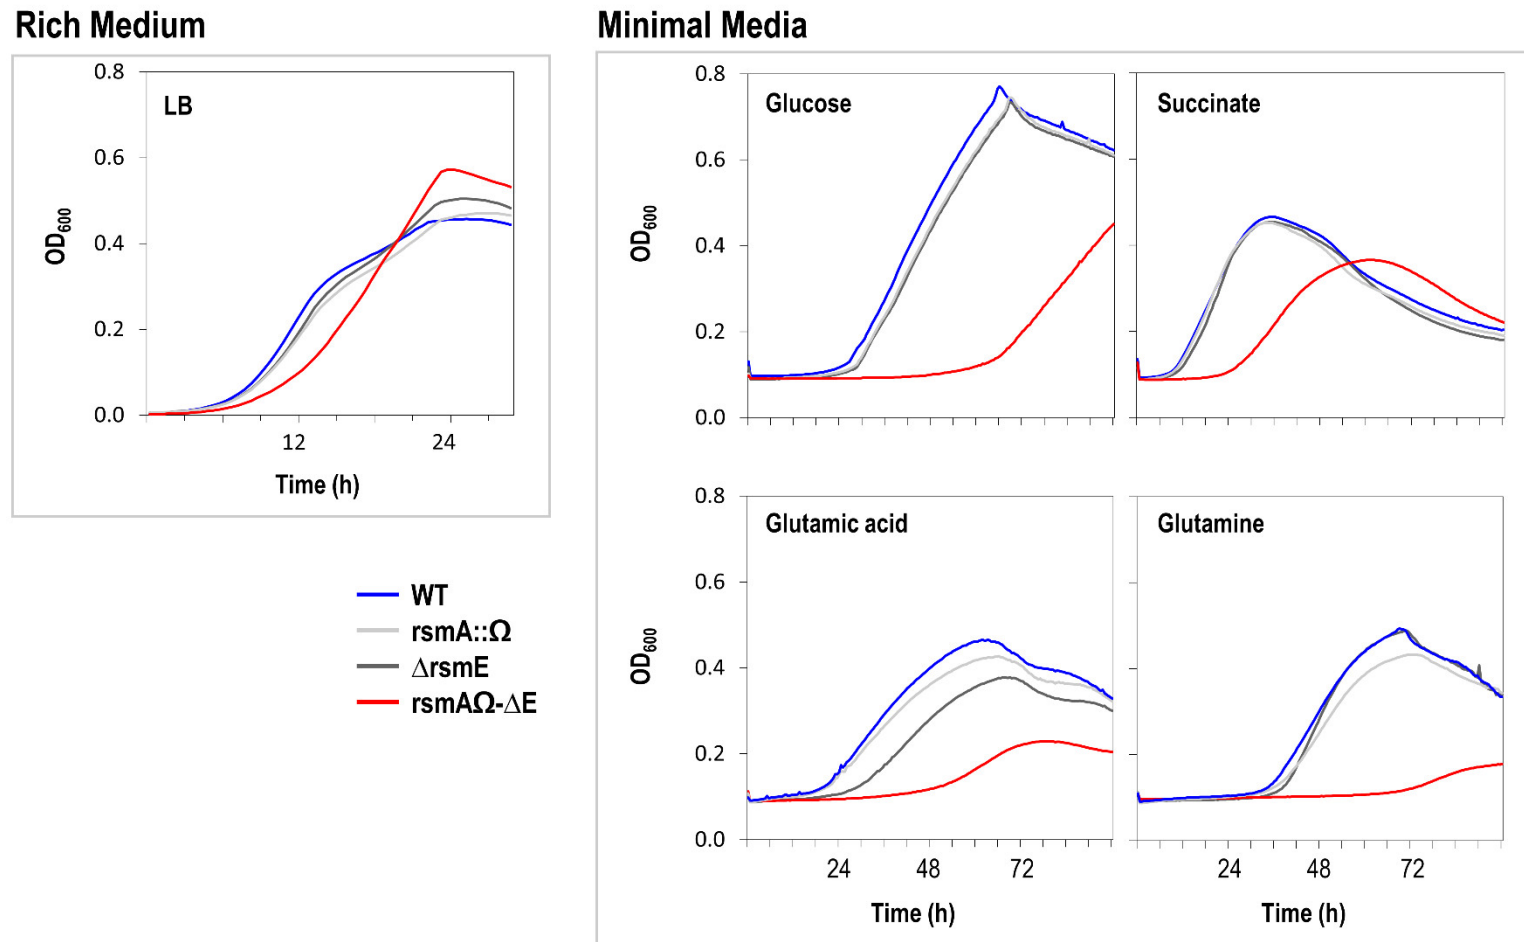

**Figure S3.** Growth curve of *P. amygdali* pv. phaseolicola 1448A and derivative mutants in LB or minimal media with different carbon sources. Cells were inoculated at  $5 \times 10^6$  cfu/mL (for LB) or  $5 \times 10^7$  cfu/mL (for minimal media) in 48-well plates, and incubated at 28 °C with continuous shaking in the multi-Detection Microplate Reader (Synergy HT; Biotek Instruments, Winooski, VT, USA), which recorded OD<sub>600</sub> reads every 30 minutes. Each value is the average from three to six technical replicates. Carbon sources were added at 0.4 % (w/v) to HSC base minimal medium; for succinate, cells were grown in minimal medium SSM. Graphs are from one representative experiment out of three with similar results.

**Table S1.** Bacterial strains and plasmids used in this study<sup>a</sup>

| Strain/plasmid                                      | Main features <sup>b</sup>                                                                                                                                         | Reference or source                        |
|-----------------------------------------------------|--------------------------------------------------------------------------------------------------------------------------------------------------------------------|--------------------------------------------|
| <b>Strains</b>                                      |                                                                                                                                                                    |                                            |
| <i>Escherichia coli</i>                             |                                                                                                                                                                    |                                            |
| NEB10β                                              | Δ( <i>mrr-hsdRMS-mcrB</i> ) <i>deoR recA1 endA1 araD139</i> Δ( <i>ara, leu</i> )7697 <i>galU galK λ<sup>-</sup> rpsL nupG</i>                                      | [3]                                        |
| CECT831                                             | Strain sensitive to phaseolotoxin, used as indicator for phaseolotoxin production bioassays                                                                        | Colección Española de Cultivos Tipo (CECT) |
| <i>Pseudomonas amygdali</i> pv. <b>phaseolicola</b> |                                                                                                                                                                    |                                            |
| UPN1160                                             | 1448A <i>rsmH1</i> -fsX                                                                                                                                            | This work                                  |
| UPN1164                                             | Derives from UPN1162; <i>rsmH1</i> -fsX Δ <i>rsmH2</i> Δ <i>rsmH3-1</i> Δ <i>rsmH3-2</i>                                                                           | This work                                  |
| UPN1166                                             | Derives from UPN1162; Δ <i>rsmE</i> Δ <i>rsmH2</i> Δ <i>rsmH3-1</i> Δ <i>rsmH3-2</i>                                                                               | This work                                  |
| UPN1176                                             | Derives from UPN1168; Δ <i>rsmE</i> <i>rsmH1</i> -fsX                                                                                                              | This work                                  |
| UPN1184                                             | Derives from UPN1176; Δ <i>rsmC</i> Δ <i>rsmE</i> <i>rsmH1</i> -fsX                                                                                                | This work                                  |
| UPN1185                                             | Derives from UPN1166; Δ <i>rsmC</i> Δ <i>rsmE</i> Δ <i>rsmH2</i> Δ <i>rsmH3-1</i> Δ <i>rsmH3-2</i>                                                                 | This work                                  |
| UPN1186                                             | Derives from UPN1162; Δ <i>rsmE</i> <i>rsmH1</i> -fsX- Δ <i>rsmH2</i> Δ <i>rsmH3-1</i> Δ <i>rsmH3-2</i>                                                            | This work                                  |
| UPN1226                                             | Derives from UPN1162; <i>rsmA</i> ::Ω Δ <i>rsmH2</i> Δ <i>rsmH3-1</i> Δ <i>rsmH3-2</i>                                                                             | This work                                  |
| UPN1228                                             | Derives from UPN1166 Δ <i>rsmE</i> <i>rsmA</i> ::Ω Δ <i>rsmH2</i> Δ <i>rsmH3-1</i> Δ <i>rsmH3-2</i>                                                                | This work                                  |
| <b>Plasmids</b>                                     |                                                                                                                                                                    |                                            |
| pSCR001                                             | 10,571 bp, GenBank accession no. <a href="https://www.ncbi.nlm.nih.gov/nuclot/DQ0059989">DQ0059989</a> , carrying the minitransposon IS-Ω-Km/hah; Km <sup>R</sup>  | [4]                                        |
| pHP45Ω                                              | Broad-host-range plasmid, source of the Ω fragment (Sp <sup>R</sup> /Sm <sup>R</sup> )                                                                             | [5]                                        |
| pJET1.2                                             | <i>E. coli</i> cloning vector 2.9 kb, Amp <sup>R</sup>                                                                                                             | Thermo Fisher Scientific                   |
| pJN105                                              | Broad-host-range expression vector, carries the <i>L</i> -arabinose-inducible <i>E. coli</i> <i>araBAD</i> promoter and the <i>araC</i> regulator; Gm <sup>R</sup> | [6]                                        |
| pJNA1                                               | pJN105 with a 533 pb fragment containing the <i>rsmC</i> gene flanked by EcoRI and SacI restriction sites; Gm <sup>R</sup>                                         | This work                                  |
| pJNA2                                               | pJN105 with a 488 pb fragment containing the <i>rsmA</i> gene flanked by EcoRI and SacI restriction sites; Gm <sup>R</sup>                                         | This work                                  |
| pJNA3                                               | pJN105 with a 1118 pb fragment containing the <i>rsmE</i> gene flanked by EcoRI and SacI restriction sites; Gm <sup>R</sup>                                        | This work                                  |
| pJNA5                                               | pJN105 with a 583 pb fragment containing the <i>rsmH1</i> gene flanked by PstI and SacI restriction sites; Gm <sup>R</sup>                                         | This work                                  |
| pJNA6                                               | pJN105 with a 723 pb fragment containing the <i>rsmH2</i> gene flanked by PstI and SacI restriction sites; Gm <sup>R</sup>                                         | This work                                  |
| pJNA7                                               | pJN105 with a 689 pb fragment containing the <i>rsmH3</i> gene flanked by EcoRI and SacI restriction sites; Gm <sup>R</sup>                                        | This work                                  |
| pK18 <i>mobsacB</i>                                 | Mobilizable cloning vector, confers sucrose-dependent lethality; Km <sup>R</sup> , Suc <sup>S</sup>                                                                | [7]                                        |

<sup>a</sup> See Table 1 in the main text for other relevant strains. <sup>b</sup> Abbreviations: Amp, ampicillin; Km, kanamycin; Gm, gentamicin; Sp, spectinomycin; Suc, sucrose. Superscripts R and S denote resistance or susceptibility, respectively. Letter Ω specifies insertion of the Ω fragment in the indicated gene (see plasmid pHP45Ω for details).

**Table S2.** List and application of primers used in this work.

| Primer name and purpose                                             | Sequence (5'→3') <sup>a</sup>       | 5' position <sup>b</sup> | Remarks                                                                                                                                                |
|---------------------------------------------------------------------|-------------------------------------|--------------------------|--------------------------------------------------------------------------------------------------------------------------------------------------------|
| Construction of <i>csrA</i> mutations                               |                                     |                          |                                                                                                                                                        |
| rsmC_F_ext                                                          | TGCCGACTACATCTTCAGGC                | 1,744,292                |                                                                                                                                                        |
| rsmC-left_R                                                         | <u>actagt</u> CAGTAACGCCCTTCAAACGC  | 1,745,317*               | Complete deletion of <i>rsmC</i> and <i>ISPsy17</i> , from 1745318-1746971                                                                             |
| rsmC-right_F                                                        | <u>actagt</u> CGACGTTGTTTCGCCTCATTG | 1,746,972                |                                                                                                                                                        |
| rsmC-right_R                                                        | <u>actagt</u> CGTCGATCTGTTGTTTCCGC  | 1,748,633*               |                                                                                                                                                        |
| rsmA_R-mut                                                          | ATGTTCAACCACTCTCGGCTG               | 4,045,687                | For insertion of the $\Omega$ fragment into the unique <i>BclI</i> site of <i>rsmA</i> ; truncates the product after amino acid 13, position 1,882,019 |
| rsmA_F-mut                                                          | GCAAATACAACGTCCCGCTG                | 4,047,554*               |                                                                                                                                                        |
| rsmE-left_F                                                         | GGTGTTCATTGTTGCCCGTC                | 3,777,563                |                                                                                                                                                        |
| rsmE-left_R                                                         | <u>actagt</u> TCTCGGCATGAGTGTAAGCG  | 3,778,775*               | Complete deletion of <i>rsmE</i> , from 3,778,776-3,779,364                                                                                            |
| rsmE-right_F                                                        | <u>actagt</u> TAATTGCTGCCTAACCCGCC  | 3,779,365                |                                                                                                                                                        |
| rsmE-right_R                                                        | <u>actagt</u> CCTTTGGAAAACCTCGGCAGC | 3,780,522*               |                                                                                                                                                        |
| rsmH1_F-mut                                                         | CACTGTAGCAGTACGGGGAC                | 894,653                  | To fill-in the unique <i>EcoRI</i> site in <i>rsmH1</i> , truncating the product after amino acid 18; position 895,777                                 |
| rsmH1_R-mut                                                         | CITTCGATCAACCACGCAGC                | 896,615*                 |                                                                                                                                                        |
| Cloning of <i>csrA</i> genes for overexpression and complementation |                                     |                          |                                                                                                                                                        |
| rsmC_1504_F                                                         | <u>gaattc</u> TATGCAGGACGAGCCTATG   | 1,745,054                |                                                                                                                                                        |
| rsmC_1504_R                                                         | <u>gagctc</u> CCAGACCGAGCTGGTAAAAC  | 1,745,567*               |                                                                                                                                                        |
| rsmA_3510_R                                                         | <u>gagctc</u> ACCCTTTTCCCCGTTTGC    | 4,046,581                |                                                                                                                                                        |
| rsmA_3510_F                                                         | <u>gaattc</u> CCGTGGTCATCGAAGAGAAG  | 4,047,068*               |                                                                                                                                                        |
| rsmE_3260_F                                                         | <u>gaattc</u> GCTCAGATCAACCCGATCAT  | 3,778,194                |                                                                                                                                                        |
| rsmE_3260_R                                                         | <u>gagctc</u> GCCAGTAAATGGCAAATCAA  | 3,779,311*               |                                                                                                                                                        |
| rsmH1_0763bis_F                                                     | <u>ctgcag</u> CCAAACGTAAAGTCGCACTG  | 895,401                  |                                                                                                                                                        |
| rsmH1_0763bis_R                                                     | <u>gagctc</u> TTGTGCTCCTGATCTGGTTG  | 895,962*                 |                                                                                                                                                        |
| rsmH2_A0105_F                                                       | <u>ctgcag</u> GGTGCTGTGCCAGAAATACC  | 91,582*                  |                                                                                                                                                        |
| rsmH2_A0105_R                                                       | <u>gagctc</u> TA CTGCGCGGCTATGTAATG | 90,879                   |                                                                                                                                                        |
| rsmH3_A0073_F                                                       | <u>gaattc</u> CACGAGAAAAGACAGGTCCAC | 5,618*                   |                                                                                                                                                        |
| rsmH3_A0073_R                                                       | <u>gagctc</u> AGCGAAATACCCACGGAAG   | 61,720                   |                                                                                                                                                        |
| Real time quantitative PCR                                          |                                     |                          |                                                                                                                                                        |
| gyrA_F                                                              | CGAGCTGAAGCAGTCCTACC                | 4,214,791*               |                                                                                                                                                        |
| gyrA_R                                                              | CGGATTTCTTGTACGGCTTG                | 4,214,637                |                                                                                                                                                        |

|                  |                          |                     |
|------------------|--------------------------|---------------------|
| qhrpL_F          | GCGCAACGAGCACAAGTTT      | 1,505,838           |
| qhrpL_R          | GGTTCAACGCAATACCACACAA   | 1,505,905*          |
| qhrpA_F          | CAGGGTATCAACAGCGTCAAGA   | 1,487,675           |
| qhrpA_R          | GCTACCCGTGTTTTTGGTCAGT   | 1,487,740*          |
| qhrpR_F          | CCCGAATCGTTGGCAGAA       | 1,485,848           |
| qhrpR_R          | CGAGCGCGGCAGACA          | 1,485,918*          |
| qFliC_F          | TCCGCCAGCACCATGACTTTCC   | 3,920,267*          |
| qFliC_R          | TCACAGCCGAACCGACACCC     | 3,920,174           |
| <hr/>            |                          |                     |
| Other purposes   |                          |                     |
| <u>pk18mob_R</u> | <u>caggaacagctatgaca</u> | Analysis of inserts |

<sup>a</sup> Restriction sites introduced in primers to facilitate cloning are in underlined lowercase. <sup>b</sup> The coordinates of the annealing point of the first nucleotide of each primer is indicated. Unless otherwise indicated in the remarks column, coordinates are for the genome of strain 1448A (accession no. NC\_005773). Asterisks indicate that the primer anneals in the reverse strand.

**Table S3.** Characteristics of the *rsm* genes from *Pseudomonas amygdali* pv. phaseolicola 1448A and their products, with homologues in *P. syringae* pv. tomato DC3000 and *P. syringae* pv. syringae B728a

| Gene <sup>a</sup>         | nt             | aa | Locus tag                      | Old locus tag              | Other names<br>in Pto<br>DC3000 <sup>b</sup> | Protein accession number in <i>P. amygdali</i> / <i>P. syringae</i><br>pathovars |                              |                              |
|---------------------------|----------------|----|--------------------------------|----------------------------|----------------------------------------------|----------------------------------------------------------------------------------|------------------------------|------------------------------|
|                           |                |    |                                |                            |                                              | phaseolicola<br>1448A                                                            | tomato DC3000                | syringae B728a               |
| <i>rsmA</i>               | 189            | 62 | PSPPH_RS17770                  | PSPPH_3510                 | <i>csrA2/rsmA2</i>                           | <a href="#">WP_002554426</a>                                                     | <a href="#">WP_002554426</a> | <a href="#">WP_002554426</a> |
| <i>rsmC</i>               | 150            | 49 | PSPPH_RS28320                  | PSPPH_1504                 | <i>csrA1/rsmA1</i>                           | <a href="#">WP_081007191</a>                                                     | <a href="#">WP_003381023</a> | <a href="#">WP_003402536</a> |
| <i>rsmD</i>               | - <sup>c</sup> | -  | -                              | -                          | <i>csrA4/rsmA4</i>                           | -                                                                                | <a href="#">WP_010216576</a> | -                            |
| <i>rsmE</i>               | 189            | 62 | PSPPH_RS16510                  | PSPPH_3260                 | <i>csrA3/rsmA3</i>                           | <a href="#">WP_002554157</a>                                                     | <a href="#">WP_002554157</a> | <a href="#">WP_002554157</a> |
| <i>rsmH1</i>              | 225            | 74 | PSPPH_RS03905                  | - <sup>d</sup>             | <i>csrA5/rsmA5</i>                           | <a href="#">WP_041924429</a>                                                     | <a href="#">WP_011103313</a> | -                            |
| <i>rsmH2</i> <sup>e</sup> | 237            | 78 | PSPPH_RS26950                  | PSPPH_A0105                | -                                            | <a href="#">WP_004667076</a>                                                     | -                            | -                            |
| <i>rsmH3</i> <sup>e</sup> | 225            | 74 | PSPPH_RS26520<br>PSPPH_RS26805 | PSPPH_A0007<br>PSPPH_A0073 | -                                            | <a href="#">WP_041924893</a>                                                     | -                            | -                            |

<sup>a</sup> Rsm subfamilies as described [1]; genes were assigned to the RsmH subfamily because they clustered closely to RsmH-type proteins in a maximum likelihood tree reconstructed using sequences and methods described in Sobrero and Valverde [1] (see Supplementary Figure S1). <sup>b</sup> As designated previously [8,9]. <sup>c</sup> -, not present. <sup>d</sup> This gene was not annotated in the earlier versions of the genome. <sup>e</sup> Genes *rsmH2* and *rsmH3* are located in plasmid p1448A-A; *rsmH3* is present in two identical copies, within a 4,133 nt repeated fragment.



## References

1. Sobrero, P.M.; Valverde, C. Comparative genomics and evolutionary analysis of RNA-binding proteins of the CsrA family in the genus *Pseudomonas*. *Front. Mol. Biosci.* **2020**, *7*, 127, doi:10.3389/fmolb.2020.00127.
2. Kumar, S.; Stecher, G.; Tamura, K. MEGA7: Molecular Evolutionary Genetics Analysis version 7.0 for bigger datasets. *Mol. Biol. Evol.* **2016**, *33*, 1870–1874, doi:10.1093/molbev/msw054.
3. Grant, S.G.; Jessee, J.; Bloom, F.R.; Hanahan, D. Differential plasmid rescue from transgenic mouse DNAs into *Escherichia coli* methylation-restriction mutants. *Proc. Natl. Acad. Sci. USA* **1990**, *87*, 4645–4649, doi:10.1073/pnas.87.12.4645.
4. Giddens, S.R.; Jackson, R.W.; Moon, C.D.; Jacobs, M.A.; Zhang, X.-X.; Gehrig, S.M.; Rainey, P.B. Mutational activation of niche-specific genes provides insight into regulatory networks and bacterial function in a complex environment. *Proc. Natl. Acad. Sci.* **2007**, *104*, 18247–18252, doi:10.1073/pnas.0706739104.
5. Prentki, P.; Krisch, H.M. *In vitro* insertional mutagenesis with a selectable DNA fragment. *Gene* **1984**, *29*, 303–313, doi:10.1016/0378-1119(84)90059-3.
6. Newman, J.R.; Fuqua, C. Broad-host-range expression vectors that carry the L-arabinose-inducible *Escherichia coli* *araBAD* promoter and the *araC* regulator. *Gene* **1999**, *227*, 197–203, doi:10.1016/S0378-1119(98)00601-5.
7. Schäfer, A.; Tauch, A.; Jäger, W.; Kalinowski, J.; Thierbach, G.; Pühler, A. Small mobilizable multipurpose cloning vectors derived from the *Escherichia coli* plasmids pK18 and pK19: selection of defined deletions in the chromosome of *Corynebacterium glutamicum*. *Gene* **1994**, *145*, 69–73, doi:10.1016/0378-1119(94)90324-7.
8. Ferreiro, M.D.; Nogales, J.; Farias, G.A.; Olmedilla, A.; Sanjuan, J.; Gallegos, M.T. Multiple CsrA proteins control key virulence traits in *Pseudomonas syringae* pv. *tomato* DC3000. *Mol. Plant-Microbe Interact.* **2018**, *31*, 525–536, doi:10.1094/mpmi-09-17-0232-r.
9. Ge, Y.; Lee, J.H.; Liu, J.; Yang, H.-w.; Tian, Y.; Hu, B.; Zhao, Y. Homologues of the RNA binding protein RsmA in *Pseudomonas syringae* pv. *tomato* DC3000 exhibit distinct binding affinities with non-coding small RNAs and have distinct roles in virulence. *Mol. Plant Pathol.* **2019**, *20*, 1217–1236, doi:10.1111/mpp.12823.
